# Supplementary material for: Food additives: distribution and co-occurrence in 126,000 food products of the French market
Source: PubMed Central journal article supplement (PMC7055242; doi:10.1038/s41598-020-60948-w), 2020-03-04
Supplement: 41598_2020_60948_MOESM1_ESM.pdf [file 41598_2020_60948_MOESM1_ESM.pdf]

## APPENDIX

### **Food additives: distribution and co-occurrence in 126 000 food products of the French market.**

*Eloi Chazelas\*<sup>1</sup>, Mélanie Deschasaux<sup>1</sup>, Bernard Srour<sup>1</sup>, Emmanuelle Kesse-Guyot<sup>1</sup>, Chantal Julia<sup>1,2</sup>, Benjamin Alles<sup>1</sup>, Nathalie Druesne-Pecollo<sup>1</sup>, Pilar Galan<sup>1</sup>, Serge Herberg<sup>1,2</sup>, Paule Latino-Martel<sup>1</sup>, Younes Esseddik<sup>1</sup>, Fabien Szabo<sup>1</sup>, Pierre Slamich<sup>3</sup>, Stephane Gigandet<sup>3</sup>, Mathilde Touvier<sup>1</sup>*

#### **Affiliations:**

<sup>1</sup> *Sorbonne Paris Nord - Paris 13 University, Inserm U1153, Inrae U1125, Cnam, Nutritional Epidemiology Research Team (EREN), Epidemiology and Statistics Research Center – University of Paris (CRESS), Bobigny, France*

<sup>2</sup> *Public Health Department, Avicenne Hospital, AP-HP, Bobigny, France*

<sup>3</sup> *Open Food Facts, France*

#### **\*Corresponding author:**

*Eloi Chazelas*

*Sorbonne Paris Nord - Paris 13 University, Inserm U1153, Inrae U1125, Cnam, Nutritional Epidemiology Research Team (EREN), Epidemiology and Statistics Research Center – University of Paris (CRESS)*

*SMBH Paris 13, 74 rue Marcel Cachin F-93017 Bobigny Cedex, France*

*E-mail: e.chazelas@eren.smbh.univ-paris13.fr*

*ORCID: 0000-0002-4156-0026*

*Tel: +33 1 48 38 73 78*

## Appendix 1: Flowchart

**379 661 products from Open Food Facts World, April 2019**

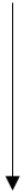

Exclusion of 239 872 products

**139 789 products marketed in France with provided list of ingredients**

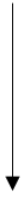

Exclusion of 13 233 duplicates

**126 556 products included**

## Appendix 2: Description of broad food categories, Open Food Facts database (n=126 556 products), France 2019

| Food category                    | Number of products | Description                                                                                                              |
|----------------------------------|--------------------|--------------------------------------------------------------------------------------------------------------------------|
| Alcoholic beverages              | 3387               | All types of alcoholic beverages                                                                                         |
| Artificially sweetened beverages | 1136               | All types of artificially sweetened beverages, including protein mixes with sweeteners and syrups with sweeteners        |
| Fruit juices and nectars         | 2672               | All types of fruit juices and nectars, including 100% fruit juices                                                       |
| Plant-based milk substitutes     | 603                | Soy/almonds/rice drinks, coconut milks, cereal-based drinks                                                              |
| Sweetened beverages              | 3961               | Sodas, sweetened iced teas and coffees, syrups                                                                           |
| Unsweetened beverages            | 3505               | Vegetables drinks, coffee and tea                                                                                        |
| Waters and flavored waters       | 441                | Unsweetened water, still or sparkling                                                                                    |
| Bread                            | 2379               | Bread, toasts, croutons                                                                                                  |
| Breakfast cereals                | 1839               | Sugary sweetened cereals, muesli, oat flakes, puffed cereals, cereal bars                                                |
| Cereals                          | 4881               | Pasta, rice, flour                                                                                                       |
| Legumes                          | 992                | Lentils, beans, chickpeas                                                                                                |
| Potatoes                         | 684                | Potatoes, sweet potatoe, plantain banana, igname                                                                         |
| One-dish meals                   | 9776               | Ready-made meals, composite salads                                                                                       |
| Pizza pies and quiche            | 1292               | Pizza, vegetable pie, meat pie, quiche                                                                                   |
| Sandwiches                       | 1001               | Sandwich, hamburger, panini                                                                                              |
| Dressings and sauces             | 4732               | Salad dressing, bechamel sauce, mayonnaise, pesto sauce                                                                  |
| Fats                             | 3372               | Butter, vegetable oils                                                                                                   |
| Meat and eggs                    | 3560               | Beef, lamb, turkey, chicken, duck, rabbit, pork, eggs, kidneys, liver, tripes, beef tongue, blood pudding                |
| Fish and seafood                 | 4443               | Salmon, tuna fish, cod, sole, t-burbot, skate, herring, sardines, anchovies, shrimps, scallops, oysters, mussels         |
| Processed meat                   | 5518               | Ham, salami, pâté, bacon, sausages                                                                                       |
| Fruits                           | 3921               | Raw and cooked fruits, fruits in syrup, dried fruit                                                                      |
| Soups                            | 772                | Soups, dry soups, minestrone, broth                                                                                      |
| Vegetables                       | 4078               | Raw and cooked vegetables                                                                                                |
| Cheese                           | 5443               | All types of cheese                                                                                                      |
| Dairy desserts                   | 1973               | Batter pudding, mousse, custard, crème brûlée, crème caramel, flan, pannacotta, rice puddings                            |
| Ice cream                        | 1443               | Ice cream, sorbet                                                                                                        |
| Milk and yogurt                  | 4995               | Milk, cottage cheese, yogurt                                                                                             |
| Appetizers                       | 2946               | Potatoe chips, crackers                                                                                                  |
| Nuts                             | 901                | Salted and unsalted nuts                                                                                                 |
| Salty and fatty products         | 2612               | Savory spreads such as houmous, tzatziki, tarama                                                                         |
| Biscuits and cakes               | 10522              | chocolate cakes, cookies, sugary pie, pancakes, clafoutis, biscuits, muffins, gingerbread, meringue, sponge cake, donuts |
| Chocolate products               | 4061               | Chocolate, chocolate bars, chocolate spread                                                                              |
| Pastries                         | 1281               | Croissants, chocolate croissants, brioche                                                                                |
| Sweets                           | 8792               | Jam, honey, sweets, chewing gums                                                                                         |
| Other                            | 12642              | Products that could not be classified (dry tea, instant coffee, spices, aromatic herbs, etc.)                            |

### Appendix 3: Description of the ClustOfVar algorithm used for variable clustering

The ClustOfVar algorithm aims at maximizing a homogeneity criterion: clusters are defined as homogeneous when the clustered variables are strongly linked (measured here by correlation ratios) to a central quantitative synthetic variable<sup>1</sup>. The synthetic variable of a cluster is the first principal component of PCAMIX applied to all variables of the cluster. Thus, it is a linear combination of the variables of the cluster<sup>2</sup>. For a given food product, the value of this synthetic variable for cluster<sub>i</sub> is directly correlated to the number of food additives of cluster<sub>i</sub> present in this food.

As stated in Chavent and colleague's article<sup>1</sup>, synthetic variable of a cluster  $C_k$  is defined as the quantitative variable  $c_k$  the "most linked" to all the variables in  $C_k$ :

$$c_k = \arg \max_{\mathbf{u} \in \mathcal{R}^n} \left\{ \sum_{x_j \in C_k} r_{\mathbf{u}, x_j}^2 + \sum_{y_j \in C_k} \eta_{\mathbf{u} | y_j}^2 \right\},$$

where  $r^2$  denotes the squared Pearson correlation and  $\eta^2$  denotes the correlation ratio. More precisely, the correlation ratio measures the part of the variance of  $\mathbf{u}$  explained by the categories of  $y_i$ :

$$\eta_{\mathbf{u} | y_j}^2 = \frac{\sum_{s \in \mathcal{M}_j} n_s (\bar{\mathbf{u}}_s - \bar{\mathbf{u}})^2}{\sum_{i=1}^n (u_i - \bar{\mathbf{u}})^2},$$

where  $n_s$  is the frequency of category  $s$ ,  $\bar{\mathbf{u}}_s$  is the mean value of  $\mathbf{u}$  calculated on the observations belonging to category  $s$  and  $\bar{\mathbf{u}}$  is the mean of  $\mathbf{u}$ .

For each cluster, a squared loading is attributed to each additive, corresponding to the correlation ratio between the food additive and the central synthetic variable of the cluster. A bootstrap process was performed to evaluate the stability of the partitions of variables and to determine a suitable number of clusters.

#### **Appendix 4: Description of the R package IsingFit used for network analysis**

The R package IsingFit<sup>3</sup> performs network analysis with an approach based on Ising models<sup>4</sup> that aims to estimate two parameters: interaction parameters which represents the strength of the interaction between two variables, and the node parameter, which represents the autonomous disposition of the variable to take the value one, regardless of neighboring variables. These parameters are estimated with logistic regressions, one variable being regressed on all other iteratively, and a  $\ell_1$  penalty (*lasso*) is applied to the regression parameters. The level of shrinkage depends on the penalty parameter of the lasso, which is determined by the *eLasso* method<sup>3</sup>, based on the Extended Bayesian Information Criterion (EBIC)<sup>5</sup>. *eLasso* has proven to be an effective method to estimate networks from binary data, and simulations indicated that the probability of including an edge that is not present in the generating network is very small.

**Appendix 5: Categorization of food items of the Open Food Facts database according to their nutritional quality scored by the Foods Standard Agency Nutrient Profiling system (FSAm- NPS)**

The Nutri-Score was selected by the French, the Spanish and the Belgian Ministries of Health as the official front-of-pack nutrition label to be implemented in these countries<sup>6</sup>. It is based on a modified version of the British Food Standards Agency Nutrient Profiling System (FSAm-NPS) and allows to categorize food products into 5 colours reflecting their nutritional quality (from A- green: best nutritional quality to E-red lower nutritional quality). It takes into account the content per 100g of energy, saturated fatty acids, sugar, sodium, dietary fibres, proteins and fruit/vegetables<sup>7</sup>: The FSAm-NPS score was available in Open Food Facts for 107302/126556 (84.8%) products and was calculated as follows: points (0–10) are allocated for the content per 100 g in total sugars (g), saturated fatty acids (g), sodium (mg), and energy (kJ) (i.e., nutrients that should be consumed in limited amounts) and can be balanced by opposite points (0–5) allocated for dietary fibres (g), proteins (g), and fruits/vegetables/legumes/nuts (percent) (i.e., nutrients/components that should be promoted). The FSAm-NPS score for each food/beverage is based on a unique discrete continuous scale ranging theoretically from –15 (most healthy) to +40 (least healthy). The detailed algorithm has been published<sup>8</sup>.

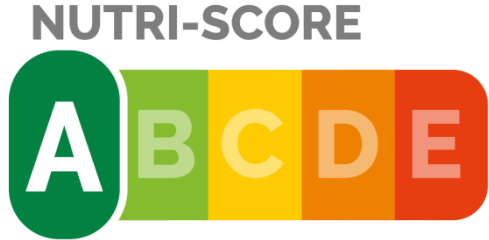

**Distribution of food items according to Nutri-score categories, Open Food Facts database, France 2019**

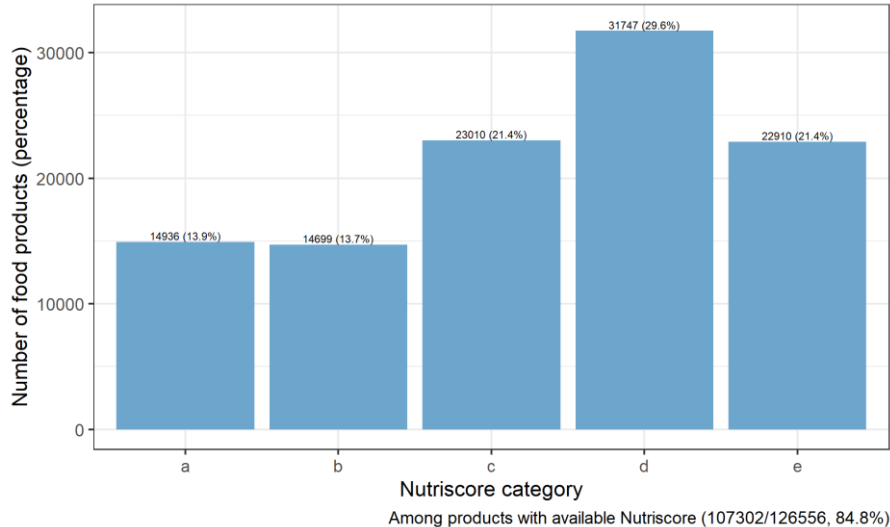

## Appendix 6: Categorization of food items of the Open Food Facts database according to the NOVA classification

All food and beverage items of the Open Food Facts database were categorized into one of the four food groups in NOVA, a food classification system based on the extent and purpose of industrial food processing<sup>9-11</sup>. NOVA groups were as follows: “unprocessed or minimally processed foods” (fresh, dried, grounded, chilled, frozen, pasteurized or fermented staple foods such as fruits, vegetables, pulses, rice, pasta, eggs, meat, fish or milk), “processed culinary ingredients” (salt, vegetable oils, butter, sugar and other substances extracted from foods and used in kitchens to transform unprocessed or minimally processed foods into culinary preparations), “processed foods” (canned vegetables with added salt, sugar-coated dry fruits, meat products only preserved by salting, cheeses and freshly made unpackaged breads, and other products manufactured with the addition of salt, sugar or other substances of the “processed culinary ingredients” group), and “ultra-processed foods” (i.e. products which undergo industrial processes notably include hydrogenation, hydrolysis, extruding, moulding, reshaping, and pre-processing by frying. Flavouring agents, colours, emulsifiers, humectants, non-sugar sweeteners and other cosmetic additives are often added to these products to imitate sensorial properties of unprocessed or minimally processed foods and their culinary preparations).

Examples of typical ultra-processed food according to the NOVA classification:

*Poultry and fish nuggets and sticks and other reconstituted meat products transformed with addition of preservatives other than salt (e.g nitrites); instant noodles and dehydrated soups; carbonated drinks; sweet or savoury packaged snacks; chocolate, candies (confectionery); margarines and spreads; industrial pastries and instant desserts; breakfast ‘cereals’, ‘energy’ bars; ‘energy’ drinks; flavoured milk drinks; sweet desserts made from fruit with added sugars, artificial flavours and texturizing agents; cooked seasoned vegetables with ready-made sauces; vegetable patties (meat substitutes) containing food additives; meat and chicken extracts and ‘instant’ sauces; ‘health’ and ‘slimming’ products such as powdered or ‘fortified’ meal and dish substitutes; ready to heat products including pre-prepared pies, pasta and pizza dishes.*

For instance, salted-only red or white meats are considered as “processed foods” whereas smoked or cured meats with added nitrites and conservatives, such as sausages and ham are classified as “ultra-processed foods”. Similarly, canned salted vegetables are considered as “processed foods” whereas industrial cooked or fried seasoned vegetables, marinated in industrial sauces with added flavourings are considered as “ultra-processed foods”. Regarding soups, canned liquid soups with added salts, herbs and spices are considered as “processed foods” while instant dry soup mixes are considered as “ultra-processed foods”.

Example of list of ingredients for an industrial Chicken and Leek flavour soup considered as “ultra-processed” according to the NOVA classification: “*Dried Glucose Syrup, Potato Starch, Flavourings, Salt, Leek Powder (3.6%), Dried Leek (3.5%), Onion Powder, Dried Carrot, Palm Oil, Dried Chicken (0.7%), Garlic Powder, Dried Parsley, Colour [Curcumin (contains MILK)], Ground Black Pepper, MILK Protein, Stabilisers (Dipotassium Phosphate, Trisodium Citrate)*”.

**Distribution of food products according to NOVA categories, Open Food Facts database (n=126 556 products), France 2019**

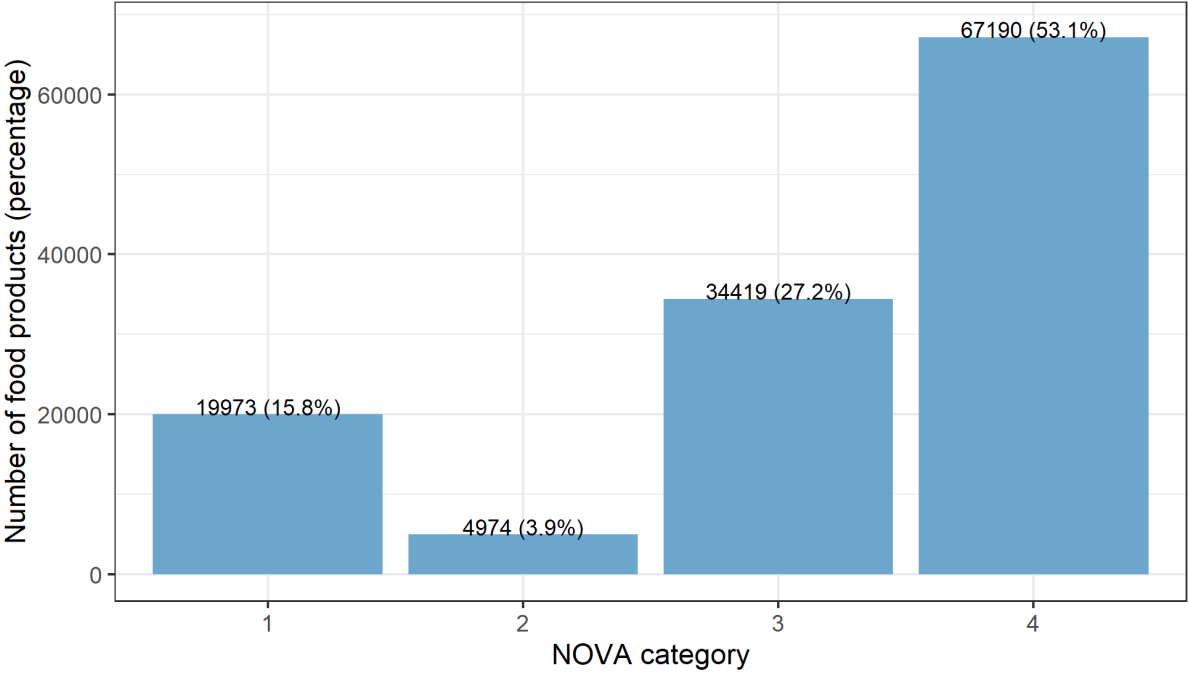

Among all products from study sample (n=126556)



## Appendix 7: Number of food products containing each food additive\*, Open Food Facts database (n=126 556 products), France 2019

| Number of products | Food additive                                        |     |                                                                               |
|--------------------|------------------------------------------------------|-----|-------------------------------------------------------------------------------|
|                    |                                                      | 831 | E 306 Tocopherol-rich extract                                                 |
| 18302              | E 330 Citric acid                                    | 828 | E 341 Calcium phosphates                                                      |
| 13102              | E 322 Lecithins                                      | 809 | E 220 Sulphur dioxide                                                         |
| 10100              | E 14XX Modified Starches                             | 797 | E 903 Carnauba wax                                                            |
| 8587               | E 500 Sodium carbonates                              | 748 | E 476 Polyglycerol polyricinoleate                                            |
| 7919               | E 300 Ascorbic acid                                  | 691 | E 200 Sorbic acid                                                             |
| 7327               | E 415 Xanthan gum                                    | 688 | E 133 Brilliant Blue FCF                                                      |
| 7144               | E 250 Sodium nitrite                                 | 669 | E 951 Aspartame                                                               |
| 6529               | E 450 Diphosphates                                   | 662 | E 171 Titanium dioxide                                                        |
| 6504               | E 440 Pectins                                        | 652 | E 481 Sodium stearoyl-2-lactylate                                             |
| 6060               | E 471 Mono-and diglycerides of fatty acids           | 599 | E 325 Sodium lactate                                                          |
| 5535               | E 412 Guar gum                                       | 597 | E 339 Sodium phosphates                                                       |
| 5418               | E 202 Potassium sorbate                              | 554 | E 965 Maltitols                                                               |
| 5322               | E 407 Carrageenan                                    | 543 | E 445 Glycerol esters of wood rosins                                          |
| 3518               | E 331 Sodium citrates                                | 520 | E 141 Copper complexes of chlorophylls, chlorophyllins                        |
| 3433               | E 301 Sodium ascorbate                               | 513 | E 631 Disodium inosinate                                                      |
| 3126               | E 503 Ammonium carbonates                            | 508 | E 162 Beetroot Red, betanin                                                   |
| 2839               | E 316 Sodium erythorbate                             | 508 | E 260 Acetic acid                                                             |
| 2641               | E 410 Locust bean gum                                | 488 | E 627 Disodium guanylate                                                      |
| 2462               | E 422 Glycerol                                       | 476 | E 960 Steviol glycosides                                                      |
| 2393               | E 420 Sorbitols                                      | 458 | E 150 Caramel                                                                 |
| 2289               | E 120 Cochineal, Carminic acid, Carmines             | 453 | E 1400 Dextrin                                                                |
| 2274               | E 270 Lactic acid                                    | 450 | E 509 Calcium chloride                                                        |
| 2135               | E 428 Gelatine                                       | 446 | E 406 Agar                                                                    |
| 2027               | E 451 Triphosphates                                  | 446 | E 461 Methyl cellulose                                                        |
| 2021               | E 621 Monosodium glutamate                           | 440 | E 290 Carbon dioxide                                                          |
| 1787               | E 160 Carotene                                       | 439 | E 460 Cellulose                                                               |
| 1758               | E 100 Curcumin                                       | 425 | E 101 Riboflavins                                                             |
| 1677               | E 262 Sodium acetates                                | 413 | E 334 Tartaric acid (L+)-                                                     |
| 1579               | E 252 Potassium nitrate                              | 402 | E 1105 Lysozyme                                                               |
| 1512               | E 414 Gum arabic (acacia gum)                        | 390 | E 153 Vegetable carbon                                                        |
| 1446               | E 452 Polyphosphates                                 | 390 | E 901 Beeswax, white and yellow                                               |
| 1364               | E 224 Potassium metabisulphite                       | 387 | E 304 Fatty acid esters of ascorbic acid                                      |
| 1283               | E 950 Acesulfame K                                   | 386 | E 575 Glucono-delta-lactone                                                   |
| 1161               | E 955 Sucralose                                      | 372 | E 333 Calcium citrates                                                        |
| 1136               | E 296 Malic acid                                     | 371 | E 235 Natamycin                                                               |
| 1055               | E 392 Extracts of rosemary                           | 361 | E 222 Sodium hydrogen sulphite                                                |
| 1032               | E 401 Sodium alginate                                | 361 | E 327 Calcium lactate                                                         |
| 1011               | E 163 Anthocyanins                                   | 352 | E 385 Calcium disodium ethylene diamine tetra-acetate (Calcium disodium EDTA) |
| 1008               | E 282 Calcium propionate                             | 339 | E 551 Silicon dioxide                                                         |
| 931                | E 223 Sodium metabisulphite                          | 335 | E 501 Potassium carbonates                                                    |
| 892                | E 211 Sodium benzoate                                | 334 | E 170 Calcium carbonate                                                       |
| 891                | E 466 Sodium carboxy methyl cellulose, Cellulose gum | 329 | E 307 Alpha-tocopherol                                                        |
| 887                | E 326 Potassium lactate                              | 329 | E 340 Potassium phosphates                                                    |

|     |                                          |    |                                                                                |
|-----|------------------------------------------|----|--------------------------------------------------------------------------------|
| 310 | E 338 Phosphoric acid                    | 76 | E 1505 Triethyl citrate                                                        |
| 309 | E 904 Shellac                            | 74 | E 261 Potassium acetates                                                       |
| 308 | E 1510 Ethanon                           | 69 | E 435 Polyoxyethylene sorbitan monostearate (polysorbate 60)                   |
| 302 | E 102 Tartrazine                         | 69 | E 968 Erythritol                                                               |
| 302 | E 131 Patent Blue V                      | 63 | E 444 Sucrose acetate isobutyrate                                              |
| 296 | E 336 Potassium tartrates                | 61 | E 228 Potassium hydrogen sulphite                                              |
| 287 | E 524 Sodium hydroxid                    | 61 | E 477 Propane-1,2-diol esters of fatty acids                                   |
| 274 | E 502 Carbonates                         | 59 | E 242 Dimethyl dicarbonate                                                     |
| 261 | E 172 Iron oxides and hydroxides         | 56 | E 1101 Protease                                                                |
| 257 | E 579 Ferrous gluconate                  | 56 | E 640 Glycine and its sodium salt                                              |
| 249 | E 418 Gellan gum                         | 55 | E 1414 Acetylated distarch phosphate                                           |
| 248 | E 920 L-cysteine                         | 54 | E 319 Tertiary-butyl hydroquinone (TBHQ)                                       |
| 242 | E 417 Tara gum                           | 53 | E 315 Erythorbic acid                                                          |
| 238 | E 953 Isomalt                            | 53 | E 529 Calcium oxide                                                            |
| 233 | E 464 Hydroxypropyl methyl cellulose     | 51 | E 142 Green S                                                                  |
| 231 | E 473 Sucrose esters of fatty acids      | 51 | E 151 Brilliant Black PN                                                       |
| 209 | E 1442 Hydroxy propyl distarch phosphate | 49 | E 472 Esters of mono- and diglycerides                                         |
| 205 | E 320 Butylated hydroxyanisole (BHA)     | 47 | E 310 Propyl gallate                                                           |
| 204 | E 635 Disodium 5'-ribonucleotides        | 47 | E 433 Polyoxyethylene sorbitan monooleate (polysorbate 80)                     |
| 201 | E 1200 Polydextrose                      | 44 | E 203 Calcium sorbate                                                          |
| 197 | E 475 Polyglycerol esters of fatty acids | 42 | E 221 Sodium sulphite                                                          |
| 191 | E 129 Allura Red AC                      | 41 | E 210 Benzoic acid                                                             |
| 187 | E 508 Potassium chloride                 | 40 | E 1520 Propylene glycol                                                        |
| 176 | E 952 Cyclamates                         | 40 | E 281 Sodium propionate                                                        |
| 173 | E 1422 Acetylated distarch adipate       | 40 | E 641 L-leucine                                                                |
| 171 | E 321 Butylated hydroxytoluene (BHT)     | 37 | E 104 Quinoline Yellow                                                         |
| 168 | E 954 Saccharins                         | 37 | E 413 Tragacanth                                                               |
| 163 | E 251 Sodium nitrate                     | 37 | E 525 Potassium hydroxide                                                      |
| 161 | E 967 Xylitol                            | 37 | E 536 Potassium ferrocyanide                                                   |
| 159 | E 110 Sunset Yellow FCF/Orange Yellow S  | 36 | E 249 Potassium nitrite                                                        |
| 153 | E 1103 Invertase                         | 35 | E 175 Gold                                                                     |
| 152 | E 140 Chlorophylls and chlorophyllins    | 33 | E 942 Nitrous oxide                                                            |
| 147 | E 132 Indigotine, Indigo carmine         | 31 | E 900 Dimethyl polysiloxane                                                    |
| 145 | E 263 Calcium acetate                    | 30 | E 1450 Starch sodium octenyl succinate                                         |
| 144 | E 350 Sodium malates                     | 29 | E 468 Cross-linked sodium carboxy methyl cellulose, cross linked cellulose gum |
| 132 | E 332 Potassium citrates                 | 29 | E 482 Calcium stearoyl-2-lactylate                                             |
| 128 | E 442 Ammonium phosphatides              | 28 | E 400 Alginate acid                                                            |
| 125 | E 1100 Alpha-Amylase                     | 27 | E 1412 Distarch phosphate                                                      |
| 114 | E 570 Fatty acids                        | 26 | E 425 Konjac                                                                   |
| 112 | E 504 Magnesium carbonates               | 25 | E 232 Sodium orthophenyl phenol                                                |
| 106 | E 421 Mannitol                           | 25 | E 526 Calcium hydroxide                                                        |
| 99  | E 535 Sodium ferrocyanide                | 24 | E 914 Oxidised polyethylene wax                                                |
| 93  | E 127 Erythrosine                        | 23 | E 234 Nisin                                                                    |
| 87  | E 122 Azorubine, Carmoisine              | 23 | E 404 Calcium alginate                                                         |
| 85  | E 492 Sorbitan tristearate               | 22 | E 297 Fumaric acid                                                             |
| 82  | E 516 Calcium sulphate                   | 22 | E 962 Salt of aspartame-acesulfame                                             |
| 79  | E 572 Magnesium stearate                 | 21 | E 576 Sodium gluconate                                                         |
| 77  | E 491 Sorbitan monostearate              | 21 | E 941 Nitrogen                                                                 |
| 76  | E 124 Ponceau 4R, Cochineal Red A        | 21 | E 959 Neohesperidine DC                                                        |

|    |                                         |   |                                                             |
|----|-----------------------------------------|---|-------------------------------------------------------------|
| 19 | E 1104 Lipase                           | 5 | E 1440 Hydroxy propyl starch                                |
| 19 | E 1420 Acetylated starch                | 5 | E 231 Orthophenyl phenol                                    |
| 19 | E 302 Calcium ascorbate                 | 5 | E 266 Sodium dehydroacetate                                 |
| 19 | E 405 Propane-1, 2-diol alginate        | 5 | E 411 Oat gum                                               |
| 19 | E 510 Ammonium chloride                 | 5 | E 554 Sodium aluminium silicate                             |
| 18 | E 1404 Oxidised starch                  | 5 | E 650 Zinc acetate                                          |
| 17 | E 1518 Glyceryl triacetate (triacetin)  | 5 | E 963 Tagatose                                              |
| 16 | E 285 Sodium tetraborate (borax)        | 4 | E 1102 Glucose oxidase                                      |
| 16 | E 335 Sodium tartrates                  | 4 | E 216 Propylparaben                                         |
| 16 | E 626 Guanylic acid                     | 4 | E 236 Formic acid                                           |
| 15 | E 212 Potassium benzoate                | 4 | E 355 Adipic acid                                           |
| 14 | E 103 Alkannin                          | 4 | E 505 Ammonium carbonates                                   |
| 14 | E 155 Brown HT                          | 4 | E 522 Aluminium potassium sulphate                          |
| 14 | E 233 Thiabendazole                     | 4 | E 585 Ferrous lactate                                       |
| 13 | E 182 Orcein                            | 4 | E 713 Tylosin                                               |
| 13 | E 541 Sodium aluminium phosphate acidic | 4 | E 961 Neotame                                               |
| 13 | E 552 Calcium silicate                  | 3 | E 1202 Polyvinylpyrrolidone                                 |
| 13 | E 555 Potassium aluminium silicate      | 3 | E 1204 Pullulan                                             |
| 12 | E 1001 Choline salts                    | 3 | E 130 Indanthrene blue RS                                   |
| 12 | E 174 Silver                            | 3 | E 1411 Distarch glycerol                                    |
| 12 | E 363 Succinic acid                     | 3 | E 343 Magnesium phosphates                                  |
| 11 | E 1201 Polyvinylpyrrolidone             | 3 | E 416 Karaya gum                                            |
| 11 | E 514 Sodium sulphates                  | 3 | E 432 Polyoxyethylene sorbitan monolaurate (polysorbate 20) |
| 10 | E 1519 Benzyl alcohol                   | 3 | E 507 Hydrochloric acid                                     |
| 10 | E 201 Sodium sorbate                    | 3 | E 520 Aluminium sulphate                                    |
| 10 | E 280 Propionic acid                    | 3 | E 580 Magnesium Gluconate                                   |
| 10 | E 511 Magnesium chloride                | 3 | E 586 4-Hexylresorcinol                                     |
| 10 | E 530 Magnesium oxide                   | 3 | E 622 Monopotassium glutamate                               |
| 9  | E 402 Potassium alginate                | 3 | E 639 Alanine                                               |
| 9  | E 487 Sodium laurylsulphate             | 3 | E 913 Lanolin                                               |
| 9  | E 515 Potassium sulphates               | 3 | E 948 Oxygen                                                |
| 9  | E 921 L-cystine                         | 3 | E 949 Hydrogen                                              |
| 9  | E 944 Propane                           | 2 | E 161 Xanthophylls                                          |
| 9  | E 957 Thaumatin                         | 2 | E 181 Tannin                                                |
| 9  | E 999 Quillaia extract                  | 2 | E 226 Calcium sulphite                                      |
| 8  | E 1521 Polyethylene glycol              | 2 | E 239 Hexamethylene tetramine                               |
| 8  | E 225 Potassium sulphite                | 2 | E 265 Dehydroacetic acid                                    |
| 8  | E 463 Hydroxypropyl cellulose           | 2 | E 311 Octyl gallate                                         |
| 8  | E 470 Salts of fatty acids              | 2 | E 337 Sodium potassium tartrate                             |
| 8  | E 630 Inosinic acid                     | 2 | E 351 Potassium malate                                      |
| 8  | E 925 Chlorine                          | 2 | E 370 1,4-Heptonolactone                                    |
| 7  | E 329 Magnesium lactate                 | 2 | E 391 Phytic acid                                           |
| 7  | E 958 Glycyrrhizin                      | 2 | E 431 Polyoxyethylene (40) stearate                         |
| 6  | E 173 Aluminium                         | 2 | E 521 Aluminium sodium sulphate                             |
| 6  | E 218 Methyl p-hydroxybenzoate          | 2 | E 558 Bentonite                                             |
| 6  | E 542 Calcium Phosphate                 | 2 | E 559 Aluminium silicate (Kaolin)                           |
| 6  | E 620 Glutamic acid                     | 2 | E 574 Gluconic acid                                         |
| 6  | E 905 Microcrystalline wax              | 2 | E 577 Potassium gluconate                                   |
| 6  | E 966 Lactitol                          | 2 | E 578 Calcium gluconate                                     |

|   |                                                                                                 |
|---|-------------------------------------------------------------------------------------------------|
| 2 | E 636 Maltol                                                                                    |
| 2 | E 902 Candelilla wax                                                                            |
| 1 | E 106 Flavin mononucleotide                                                                     |
| 1 | E 125 Ponceau SX                                                                                |
| 1 | E 1410 Monostarch phosphate                                                                     |
| 1 | E 143 Fast Green FCF                                                                            |
| 1 | E 1503 Castor oil                                                                               |
| 1 | E 152 Black 7984                                                                                |
| 1 | E 180 Litholrubine BK                                                                           |
| 1 | E 209 Heptylparaben                                                                             |
| 1 | E 214 Ethyl-p-hydroxybenzoate                                                                   |
| 1 | E 230 Biphenyl                                                                                  |
| 1 | E 238 Calcium formiate                                                                          |
| 1 | E 284 Boric acid                                                                                |
| 1 | E 303 Potassium ascorbate                                                                       |
| 1 | E 312 Dodecyl gallate                                                                           |
| 1 | E 315 Erythorbic acid                                                                           |
| 1 | E 323 Anoxomer                                                                                  |
| 1 | E 328 Ammonium lactate                                                                          |
| 1 | E 342 Ammonium phosphates                                                                       |
| 1 | E 345 Magnesium citrate                                                                         |
| 1 | E 352 Calcium malates                                                                           |
| 1 | E 353 Metatartaric acid                                                                         |
| 1 | E 381 Ammonium ferrocitrate                                                                     |
| 1 | E 386 Disodium EDTA                                                                             |
| 1 | E 419 Gum ghatti                                                                                |
| 1 | E 427 Cassia gum                                                                                |
| 1 | E 429 Peptone                                                                                   |
| 1 | E 436 Polyoxyethylene sorbitan tristearate (polysorbate 65)                                     |
| 1 | E 443 Brominated vegetable oil                                                                  |
| 1 | E 446 Succistearin                                                                              |
| 1 | E 457 Alpha-Cyclodextrine                                                                       |
| 1 | E 459 Beta-cyclodextrin                                                                         |
| 1 | E 462 Ethyl cellulose                                                                           |
| 1 | E 467 Ethulose                                                                                  |
| 1 | E 469 Enzymatically hydrolysed carboxy methyl cellulose, Enzymatically hydrolysed cellulose gum |
| 1 | E 486 Calcium stearoyl fumarate                                                                 |
| 1 | E 493 Sorbitan monolaurate                                                                      |
| 1 | E 513 Sulphuric acid                                                                            |
| 1 | E 518 Magnesium sulphate                                                                        |
| 1 | E 528 Magnesium hydroxide                                                                       |
| 1 | E 550 Sodium silicate                                                                           |
| 1 | E 553 Magnesium silicates                                                                       |
| 1 | E 637 Ethyl maltol                                                                              |
| 1 | E 638 Sodium aspartame                                                                          |
| 1 | E 910 Wax ester                                                                                 |
| 1 | E 916 Calcium iodate                                                                            |

\* decreasing number of occurrences. Number of products containing each of the specific modified starches may be underestimated in the database due to lack of detail on food packaging

**Appendix 8a: Stability plot of food additive clusters determined by the ClustOfVar R package, Open Food Facts database, France 2019**

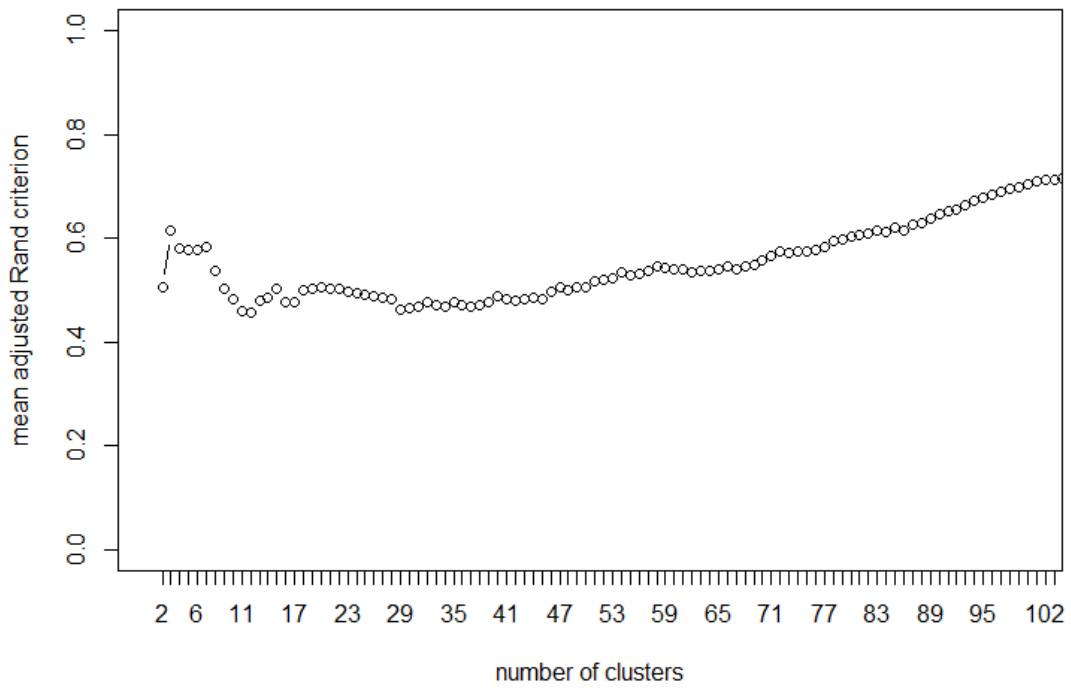

**Appendix 8b: Cluster of food additives and respective squared loadings determined by the ClustOfVar R package, Open Food Facts database, France 2019**

| Cluster                                                                                                | Squared loading                                | Food additive                                                                           |
|--------------------------------------------------------------------------------------------------------|------------------------------------------------|-----------------------------------------------------------------------------------------|
| Cluster 1: dyes and glazing agents mostly used in sweets (n=24 food additives)                         | 0.471                                          | E 903 Carnauba wax                                                                      |
|                                                                                                        | 0.288                                          | E 901 Beeswax, white and yellow                                                         |
|                                                                                                        | 0.274                                          | E 171 Titanium dioxide                                                                  |
|                                                                                                        | 0.236                                          | E 100 Curcumin                                                                          |
|                                                                                                        | 0.203                                          | E 133 Brilliant Blue FCF                                                                |
|                                                                                                        | 0.17                                           | E 131 Patent Blue V                                                                     |
|                                                                                                        | 0.168                                          | E 414 Gum arabic (acacia gum)                                                           |
|                                                                                                        | 0.167                                          | E 120 Cochineal, Carminic acid, Carmines                                                |
|                                                                                                        | 0.165                                          | E 163 Anthocyanins                                                                      |
|                                                                                                        | 0.146                                          | E 350 Sodium malates                                                                    |
|                                                                                                        | 0.115                                          | E 296 Malic acid                                                                        |
|                                                                                                        | 0.11                                           | E 904 Shellac                                                                           |
|                                                                                                        | 0.1                                            | E 153 Vegetable carbon                                                                  |
|                                                                                                        | 0.086                                          | E 132 Indigotine, Indigo carmine                                                        |
|                                                                                                        | 0.073                                          | E 141 Copper complexes of chlorophylls, chlorophyllins                                  |
|                                                                                                        | 0.065                                          | E 161b Lutein                                                                           |
|                                                                                                        | 0.065                                          | E 172 Iron oxides and hydroxides                                                        |
|                                                                                                        | 0.064                                          | E 162 Beetroot Red, betanin                                                             |
|                                                                                                        | 0.05                                           | E 102 Tartrazine                                                                        |
|                                                                                                        | 0.044                                          | E 110 Sunset Yellow FCF/Orange Yellow S                                                 |
| 0.04                                                                                                   | E 160c Paprika extract, capsanthin, capsorubin |                                                                                         |
| 0.04                                                                                                   | E 129 Allura Red AC                            |                                                                                         |
| 0.015                                                                                                  | E 140 Chlorophylls and chlorophyllins          |                                                                                         |
| 0.011                                                                                                  | E 445 Glycerol esters of wood rosins           |                                                                                         |
| Cluster 2: wide range of additives mostly used in sandwiches and sugary desserts (n=61 food additives) | 0.262                                          | E 415 Xanthan gum                                                                       |
|                                                                                                        | 0.254                                          | E 14xx Modified Starches                                                                |
|                                                                                                        | 0.254                                          | E 471 Mono- and diglycerides of fatty acids                                             |
|                                                                                                        | 0.233                                          | E 412 Guar gum                                                                          |
|                                                                                                        | 0.178                                          | E 407 Carrageenan                                                                       |
|                                                                                                        | 0.177                                          | E 330 Citric acid                                                                       |
|                                                                                                        | 0.163                                          | E 202 Potassium sorbate                                                                 |
|                                                                                                        | 0.12                                           | E 410 Locust bean gum                                                                   |
|                                                                                                        | 0.106                                          | E 160a Carotenes                                                                        |
|                                                                                                        | 0.097                                          | E 331 Sodium citrates                                                                   |
|                                                                                                        | 0.079                                          | E 401 Sodium alginate                                                                   |
|                                                                                                        | 0.077                                          | E 300 Ascorbic acid                                                                     |
|                                                                                                        | 0.07                                           | E 282 Calcium propionate                                                                |
|                                                                                                        | 0.057                                          | E 224 Potassium metabisulphite                                                          |
|                                                                                                        | 0.055                                          | E 472e Mono- and diacetyl tartaric acid esters of mono- and diglycerides of fatty acids |
|                                                                                                        | 0.054                                          | E 472b Lactic acid esters of mono- and diglycerides of fatty acids                      |
|                                                                                                        | 0.053                                          | E 160 Carotene                                                                          |
|                                                                                                        | 0.05                                           | E 440 Pectins                                                                           |
|                                                                                                        | 0.049                                          | E 481 Sodium stearoyl-2-lactylate                                                       |
|                                                                                                        | 0.048                                          | E 270 Lactic acid                                                                       |
|                                                                                                        | 0.044                                          | E 466 Sodium carboxy methyl cellulose, Cellulose gum                                    |
|                                                                                                        | 0.033                                          | E 428 Gelatine                                                                          |
|                                                                                                        | 0.024                                          | E 417 Tara gum                                                                          |
|                                                                                                        | 0.023                                          | E 475 Polyglycerol esters of fatty acids                                                |
| 0.022                                                                                                  | E 339 Sodium phosphates                        |                                                                                         |
| 0.02                                                                                                   | E 101 Riboflavins                              |                                                                                         |
| 0.02                                                                                                   | E 200 Sorbic acid                              |                                                                                         |
| 0.016                                                                                                  | E 150a Plain caramel                           |                                                                                         |
| 0.016                                                                                                  | E 211 Sodium benzoate                          |                                                                                         |

|                      |       |                                                                               |
|----------------------|-------|-------------------------------------------------------------------------------|
|                      | 0.015 | E 332 Potassium citrates                                                      |
|                      | 0.015 | E 333 Calcium citrates                                                        |
|                      | 0.014 | E 460 Cellulose                                                               |
|                      | 0.014 | E 575 Glucono-delta-lactone                                                   |
|                      |       | E 385 Calcium disodium ethylene diamine tetra-acetate (Calcium disodium EDTA) |
|                      | 0.013 | E 260 Acetic acid                                                             |
|                      | 0.013 | E 509 Calcium chloride                                                        |
|                      | 0.012 | E 341 Calcium phosphates                                                      |
|                      | 0.012 | E 160b Annatto, Bixin, Norbixin                                               |
|                      | 0.011 | E 461 Methyl cellulose                                                        |
|                      | 0.01  | E 222 Sodium hydrogen sulphite                                                |
|                      | 0.009 | E 1422 Acetylated distarch adipate                                            |
|                      | 0.008 | E 920 L-cysteine                                                              |
|                      | 0.008 | E 472c Citric acid esters of mono- and diglycerides of fatty acids            |
|                      | 0.008 | E 263 Calcium acetate                                                         |
|                      | 0.007 | E 223 Sodium metabisulphite                                                   |
|                      | 0.006 | E 1442 Hydroxy propyl distarch phosphate                                      |
|                      | 0.005 | E 327 Calcium lactate                                                         |
|                      | 0.004 | E 150b Caustic sulphite caramel                                               |
|                      | 0.004 | E 464 Hydroxypropyl methyl cellulose                                          |
|                      | 0.004 | E 220 Sulphur dioxide                                                         |
|                      | 0.002 | E 392 Extracts of rosemary                                                    |
|                      | 0.002 | E 406 Agar                                                                    |
|                      | 0.001 | E 1510 Ethanon                                                                |
|                      | 0.001 | E 1105 Lysozyme                                                               |
|                      | 0.001 | E 579 Ferrous gluconate                                                       |
|                      | 0.001 | E 1100 Alpha-Amylase                                                          |
|                      | 0.001 | E 418 Gellan gum                                                              |
|                      | 0.001 | E 504 Magnesium carbonates                                                    |
|                      | 0     | E 570 Fatty acids                                                             |
|                      | 0     | E 251 Sodium nitrate                                                          |
|                      | 0     | E 235 Natamycin                                                               |
|                      | <hr/> |                                                                               |
|                      | 0.64  | E 500 Sodium carbonates                                                       |
|                      | 0.431 | E 450 Diphosphates                                                            |
|                      | 0.29  | E 322 Lecithins                                                               |
|                      | 0.281 | E 503 Ammonium carbonates                                                     |
| Cluster 3:           | 0.263 | E 422 Glycerol                                                                |
| stabilizers and      | 0.196 | E 420 Sorbitols                                                               |
| emulsifiers mostly   | 0.036 | E 476 Polyglycerol polyricinoleate                                            |
| used in biscuits and | 0.033 | E 473 Sucrose esters of fatty acids                                           |
| cakes (n=13 food     | 0.028 | E 336 Potassium tartrates                                                     |
| additives)           | 0.024 | E 334 Tartaric acid (L(+)-)                                                   |
|                      | 0.009 | E 1103 Invertase                                                              |
|                      | 0.003 | E 442 Ammonium phosphatides                                                   |
|                      | 0.002 | E 524 Sodium hydroxid                                                         |
|                      | <hr/> |                                                                               |
| Cluster 4:           | 0.486 | E 950 Acesulfame K                                                            |
| sweeteners mostly    | 0.48  | E 951 Aspartame                                                               |
| used in sugar-free   | 0.36  | E 967 Xylitol                                                                 |
| chewing gums and     | 0.348 | E 965 Maltitols                                                               |
| artificially         | 0.341 | E 421 Mannitol                                                                |
| sweetened            | 0.279 | E 321 Butylated hydroxytoluene (BHT)                                          |



|                                                                                                                                               |                                   |                                          |
|-----------------------------------------------------------------------------------------------------------------------------------------------|-----------------------------------|------------------------------------------|
| beverages (n=19<br>food additives)                                                                                                            | 0.218                             | E 953 Isomalt                            |
|                                                                                                                                               | 0.217                             | E 955 Sucralose                          |
|                                                                                                                                               | 0.111                             | E 320 Butylated hydroxyanisole (BHA)     |
|                                                                                                                                               | 0.056                             | E 170 Calcium carbonate                  |
|                                                                                                                                               | 0.04                              | E 338 Phosphoric acid                    |
|                                                                                                                                               | 0.032                             | E 952 Cyclamates                         |
|                                                                                                                                               | 0.025                             | E 1200 Polydextrose                      |
|                                                                                                                                               | 0.023                             | E 954 Saccharins                         |
|                                                                                                                                               | 0.022                             | E 150d Sulphite ammonia caramel          |
|                                                                                                                                               | 0.007                             | E 960 Steviol glycosides                 |
| 0.004                                                                                                                                         | E 1400 Dextrin                    |                                          |
| 0.002                                                                                                                                         | E 290 Carbon dioxide              |                                          |
|                                                                                                                                               | 0                                 | E 150 Caramel                            |
| <hr/>                                                                                                                                         |                                   |                                          |
| Cluster 5: flavor<br>enhancers<br>additives mostly<br>used in instant<br>noodles and other<br>umami-tasting<br>foods (n=13 food<br>additives) | 0.781                             | E 631 Disodium inosinate                 |
|                                                                                                                                               | 0.771                             | E 627 Disodium guanylate                 |
|                                                                                                                                               | 0.448                             | E 621 Monosodium glutamate               |
|                                                                                                                                               | 0.096                             | E 551 Silicon dioxide                    |
|                                                                                                                                               | 0.085                             | E 501 Potassium carbonates               |
|                                                                                                                                               | 0.074                             | E 635 Disodium 5'-ribonucleotides        |
|                                                                                                                                               | 0.048                             | E 150c Ammonia caramel                   |
|                                                                                                                                               | 0.032                             | E 306 Tocopherol-rich extract            |
|                                                                                                                                               | 0.009                             | E 340 Potassium phosphates               |
|                                                                                                                                               | 0.003                             | E 304 Fatty acid esters of ascorbic acid |
| 0.001                                                                                                                                         | E 307 Alpha-tocopherol            |                                          |
| 0                                                                                                                                             | E 502 Carbonates                  |                                          |
|                                                                                                                                               | 0                                 | E 307c Tocopherol                        |
| <hr/>                                                                                                                                         |                                   |                                          |
| Cluster 6:<br>preservatives and<br>antioxidants mostly<br>used in processed<br>meat (n=11 food<br>additives)                                  | 0.633                             | E 250 Sodium nitrite                     |
|                                                                                                                                               | 0.383                             | E 316 Sodium erythorbate                 |
|                                                                                                                                               | 0.362                             | E 301 Sodium ascorbate                   |
|                                                                                                                                               | 0.272                             | E 451 Triphosphates                      |
|                                                                                                                                               | 0.233                             | E 262 Sodium acetates                    |
|                                                                                                                                               | 0.198                             | E 326 Potassium lactate                  |
|                                                                                                                                               | 0.104                             | E 325 Sodium lactate                     |
|                                                                                                                                               | 0.104                             | E 452 Polyphosphates                     |
|                                                                                                                                               | 0.086                             | E 252 Potassium nitrate                  |
| 0.051                                                                                                                                         | E 407a Processed eucheama seaweed |                                          |
| 0.015                                                                                                                                         | E 508 Potassium chloride          |                                          |

## REFERENCES

1. Chavent, M., Kuentz-Simonet, V., Liqueur, B. & Saracco, J. ClustOfVar: An R Package for the Clustering of Variables. *Journal of Statistical Software* **50**, 1–16 (2012).
2. Chavent, M., Vanessa, K. & Saracco, J. Orthogonal rotation in PCAMIX. *Adv Data Anal Classif* **6**, 131–146 (2012).
3. van Borkulo, C. D. *et al.* A new method for constructing networks from binary data. *Sci Rep* **4**, 5918 (2014).
4. Speed, T. P. & Kiiveri, H. T. Gaussian Markov Distributions over Finite Graphs. *The Annals of Statistics* **14**, 138–150 (1986).
5. Chen, J. & Chen, Z. Extended Bayesian information criteria for model selection with large model spaces. *Biometrika* **95**, 759–771 (2008).
6. Julia, C., Etilé, F. & Hercberg, S. Front-of-pack Nutri-Score labelling in France: an evidence-based policy. *The Lancet Public Health* **3**, e164 (2018).
7. Julia, C. *et al.* Application of the British Food Standards Agency nutrient profiling system in a French food composition database. *Br.J Nutr.* **112**, 1699–1705 (2014).
8. Egnell, M., Hercberg, S. & Julia, C. Development and validation of the Nutri-Score A colour-coded summary front-of-pack nutrition label. *eFOOD Lab\_International* (2019).
9. Monteiro, C. A. *et al.* NOVA. The star shines bright. *I* **7**, 28–38 (2016).
10. Monteiro, C. A. *et al.* The UN Decade of Nutrition, the NOVA food classification and the trouble with ultra-processing. *Public Health Nutr.* 1–13 (2017) doi:10.1017/S1368980017000234.
11. Moubarac, J.-C., Parra, D. C., Cannon, G. & Monteiro, C. A. Food Classification Systems Based on Food Processing: Significance and Implications for Policies and Actions: A Systematic Literature Review and Assessment. *Curr Obes Rep* **3**, 256–272 (2014).
